# Supplementary material for: A robust recurrent ANFIS for modeling multi-step-ahead flood forecast of Three Gorges Reservoir in the Yangtze River
Source: Copernicus journal article supplement (doi:10.5194/hess-2017-457), 2017-07-31
Supplement: Supplementary file [file hess-2017-457-AC2-supplement.pdf]

Dear Professor Roberto Greco,

We are very glad to learn reviewers' recognition on the value of our study and sincerely thank the constructive comments and suggestions to our manuscript (Ref: hess-2017-457). This revision focused on answering the question about the kind of model (recurrent or not) and explaining how the recurrent learning mechanism could be effectively used to predict the multi-step-ahead floods through using inter feedback in the proposed Model 2&3 as the external value (observed flood) is missing. Responses were made to every comment raised by the reviewer, and revisions were incorporated into the revised manuscript. Changes made in the revised manuscript were colored in blue. Modifications in the revised manuscript were made to meet the publication standards required by the HESS.

As known, accurate and robust multi-step-ahead flood forecast during flood season is extremely crucial to reservoir flood control. A modified hybrid learning algorithm, which fuses the Least Square Estimator (LSE) with Genetic Algorithm (GA), is proposed for optimizing the parameters of recurrent ANFIS (R-ANFIS) model to overcome the instability and local minima problems as well as improve model's generalization and robustness. We wish to have an opportunity to share our research methodology and findings with readers through the HESS.

Best Regards,

Fi-John Chang

Professor, Department of Bioenvironmental Systems Engineering

Yanlai Zhou

Post-doctor, Department of Bioenvironmental Systems Engineering

National Taiwan University

Email: changfj@ntu.edu.tw (F. Chang); zyl23bulls@whu.edu.cn (Y. Zhou).

Tel: +886-2-33663452

## **Responses to Referee #2:**

*The paper deals with the forecasting of the flood of the TGR using ANFIS model with three versions of this solution. Generally, the paper is not extremely rigorous. For example, the goal is to predict the flood of the dam. But what is the flood of the dam: the flood of the input river (how long upstream to not being influenced by the level in the reservoir)? The flood at the output of the reservoir (to be able to manage flood downstream)?*

**Reply:** We thank you for taking time to read our manuscript and give valuable and constructive comments. As known, the flood forecasting is essential to provide sufficient hydrological information for rational decision making. Accurate and robust multi-step-ahead flood forecast is extremely crucial and desired to TGR flood control and water resources utilization. Based on your very constructive comments and suggestions, we have refined our statements to explain how the recurrent learning mechanism could be effectively used to predict multi-step-ahead floods. We have also modified the Fig 3 to clear represent the recurrent models (Model 2&3) and the traditional (no recurrent) ANFIS model (Model 1). Moreover, we have added (as suggested) the Coefficient of persistence ( $G_{\text{bench}}$ ) as one of the evaluation criterion to demonstrate the models' utility of prediction.

We begin with what is the flood of the dam. Indeed, the floods of TGR ( $Q_o$ ) are transformed from the reservoir water level and reservoir outflow, as shown follow.

$$Q_o(t) = \frac{[S(t+1) - S(t)]}{\Delta t} + R(t)$$

where  $Q_o(t)$  is the floods of TGR at  $t$ th time,  $R(t)$  is the observed water releases of TGR at  $t$ th time (from Yichang streamflow gauged station),  $S(t)$  and  $S(t+1)$  are the reservoir storage (transferred from observed reservoir water level) at  $t$ th &  $t+1$ th time, respectively.

Hence, the floods of TGR contain the upstream flows (controlled by streamflow gauged station), indirect runoffs (yielded from rainfalls) and direct rainfalls (directly dropped in the reservoir). All of upstream flow inputs (streamflow gauged stations) used in our case are not being influenced by TGR water level. The observations of XJB reservoir flow, eight flow gauged stations, I & II region rainfalls and TGR flow in the flood season (June 1st to September 30th) from 2003 to 2016 (14 years) with 6 hours' time-step are available for modelling multi-step-ahead TGR inflow forecasts.

-----

*For the same lack of accuracy, the following sentence has no meaning, mathematically speaking “Vulnerability represents the incompetence of a model to resist the effects of a hostile environment (e.g., the stochastic nature of hydrological variable”. It should be better to correct this sentence and to be more accurate and more mathematical in several occasions in the paper (please, see technical comments). Moreover, in my opinion being stochastic is not the real problem. The real problem comes from the ungaussian property of hydrologic signals.*

**Reply:** The constructive comment is sincerely appreciated. We agree and have revised the following statement to be more mathematical description of vulnerability used in this study.

Vulnerability of model refers to the maximum Relative Absolute Error (RAE) of model forecast if RAE is greater than the threshold value of qualified forecast.

$$\text{Vulnerability} = \max_{i=1}^N \{V_i\} \quad (9a)$$

$$V_i = \begin{cases} \text{RAE}_i, & \text{if } (\text{RAE}_i > \delta) \\ 0 & \text{else} \end{cases} \quad (9b)$$

-----

*Suffering from the same cause, it is not so easy to know if the models are recurrent or no recurrent. This question is essential because the design of a really recurrent model, where the input is the previously calculated output, is more difficult. It seems to appear that the models are not recurrent (the input seems to be the previous measured discharge plus upstream measured discharges and rains, see table 2). If the model uses previous observed discharge (using  $Q_o(t)$  to forecast  $Q_f(t+i)$ ) then it is mandatory to evaluate the quality using the persistency criteria in order to appreciate if the model has an added value or not (please see technical comments). Also, all along the paper the variable  $Q(t)$  is used. Nevertheless, the variables  $Q_f$  (forecasted discharge) or  $Q_o$  (observed discharge) are also defined. Thus what does  $Q$  represent?*

**Reply:** We thank you for point-out the indistinct places (models & statements). We clarify the misleading statements and then make all the necessary modification (Table2 & Fig 3). We notice the recurrent learning mechanism is used in our proposed Models (Model 2&3 shown in the revised Fig 3) to predict the multistep ahead floods by using inter feedback (forecasted value).

Sorry for mixed-up of the variable  $Q$ . We have changed the variable  $Q(t)$  into  $Q_o(t)$  in Table 2. As shown in Table 2, the Gamma test (GT) is used to select model input,

i.e., to determine the best set of inputs from a list of possible inputs for the data-driven models.

Table 2 The optimal lagged variables and input combinations (observed data) used in the three models

| Station     | Travel time | Sub-opt | Opt     | Ben (I) | Sub-opt | Opt    | Ben (II) | Sub-opt | Opt    |
|-------------|-------------|---------|---------|---------|---------|--------|----------|---------|--------|
| Xiangjiaba  | 48h         | Qo(t-4) | Qo(t-4) | Qo(t)   | Qo(t)   | Qo(t)  | Qo(t)    | Qo(t)   | Qo(t)  |
| Hengjiang   | 48h         | Qo(t-4) | Qo(t-4) | Qo(t)   | Qo(t)   | Qo(t)  | Qo(t)    | Qo(t)   | Qo(t)  |
| Fuxi        | 42h         | Qo(t-3) | Qo(t-3) | Qo(t)   | Qo(t)   | Qo(t)  | Qo(t)    | Qo(t)   | /      |
| Gaochang    | 48h         | Qo(t-4) | Qo(t-4) | Qo(t)   | Qo(t)   | Qo(t)  | Qo(t)    | Qo(t)   | Qo(t)  |
| Fushun      | 42h         | Qo(t-3) | Qo(t-3) | Qo(t)   | Qo(t)   | Qo(t)  | Qo(t)    | /       | /      |
| Chishui     | 24h         | Qo(t)   | Qo(t)   | Qo(t)   | /       | /      | Qo(t)    | /       | /      |
| Wucha       | 12-18h      | Qo(t)   | Qo(t)   | Qo(t)   | /       | /      | Qo(t)    | /       | /      |
| Beibei      | 12-18h      | Qo(t)   | Qo(t)   | Qo(t)   | /       | /      | Qo(t)    | /       | /      |
| Wulong      | 6-12h       | Qo(t)   | Qo(t)   | Qo(t)   | /       | /      | Qo(t)    | /       | /      |
| I Rainfall  | 42-48h      | R(t-1)  | R(t-2)  | R(t)    | /       | R(t)   | R(t)     | /       | /      |
| II Rainfall | 12-18h      | R(t)    | R(t)    | R(t)    | /       | /      | R(t)     | /       | /      |
| TGR         | /           | Qo(t)   | Qo(t)   | Qo(t)   | Qo(t)   | Qo(t)  | Qo(t)    | Qo(t)   | Qo(t)  |
| Horizon     | /           | t+4     | t+4     | t+8     | t+8     | t+8    | t+12     | t+12    | t+12   |
| Ratio       | /           | 0.0007  | 0.0001  | 0.0115  | 0.0081  | 0.0012 | 0.0121   | 0.0097  | 0.0015 |

We have revised Figure 3 to explain how the recurrent learning mechanism will be used to simulate and predict when external feedback (observed value) is missing, by using inter feedback (simulated value) in Model 2&3.

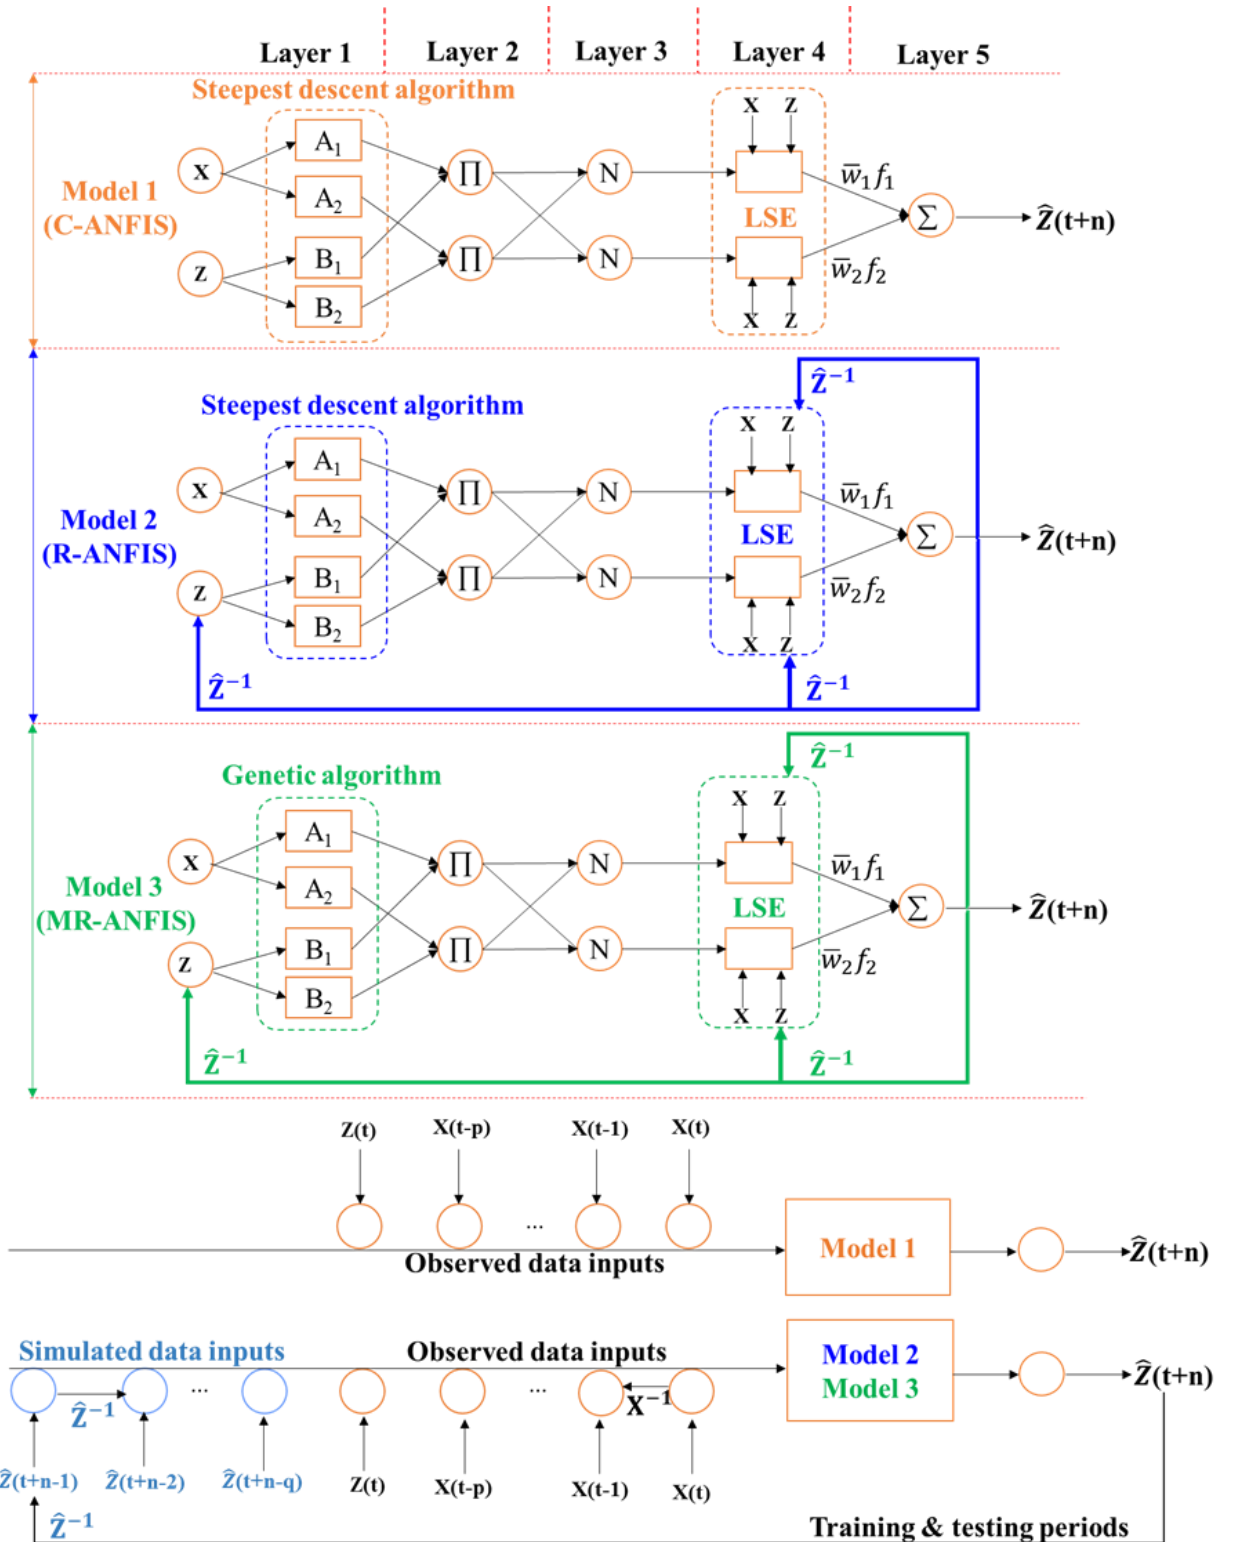

Figure 3 Framework of three ANFIS modeling approaches (Notes:  $n$  denotes the horizon.  $\hat{Z}(t)$  and  $Z(t)$  denote the simulated and observed inflow of TGR, respectively.  $X(t)$  denotes the observed flow or rainfall of upper basin,  $p$  and  $q$  are the inputs time-lag and feedback time-lag, respectively).

-----  
*The procedure of training is not accurately described (p6 L13: “After implementing an intensive trial-and-error procedure). Let me recall that the paper must be sufficiently accurate to could be reproduced by other people. It is evident that it is not the case.*

**Reply:** The constructive comment is sincerely appreciated. The procedure of training model has been more accurately described and shown in the section 3.2 and Figure 4.

-----  
*P11, what is “the recurrent learning mechanism”?*

**Reply:** Thanks for your constructive comment. The recurrent learning mechanism is used to make multistep predictions in Models 2&3. We have revised Figure 3 to explain how the recurrent learning mechanism is used to predict when external feedback (observed value) is missing and/or unavailable, by using inter feedback (forecasted value) in Model 2&3.

-----  
*The same applies to the procedure of variable selection: the method is not described. But variable selection is essential in data driven models.*

**Reply:** Thanks for your constructive comment. We have used the Gamma test to select model input to determine the best embedding dimension and delay time for time series and to identify the best set of inputs from a list of possible inputs for data-driven model. The Gamma Test only contain the observed inputs and output, not include the simulated or forecasted output of data-driven model. The Gamma test assume that training and testing data are different sample sets in which: (a) the training set inputs are non-sparse in input-space; (b) each output is determined from the inputs by a deterministic process which is the same for both training and test sets; (c) each output is subjected to statistical noise with finite variance whose distribution may be different for different outputs but which is the same in both training and test sets for corresponding outputs. Hence, the Gamma test is separated from data-driven model and can be applied to the procedure of variable selection. The Gamma Test (Koncar 1997) is one of the state-of-the-art input selection techniques and has been successfully used in various hydrological modelling (ex. Chang & Tsai, 2016; Remesan, et al., 2008).

Koncar, N., 1997. Optimisation methodologies for direct inverse neurocontrol, PhD thesis, Department of Computing, Imperial College of Science, Technology and Medicine, University of London.

Chang, F. J., Tsai, M. J., 2016. A nonlinear spatio-temporal lumping of radar rainfall for modeling multi-step-ahead inflow forecasts by data-driven techniques. Journal of Hydrology, 535(2), 256-269.

Remesan, R., Shamim, M. A., Han, D., 2008. Model data selection using gamma test for daily solar radiation estimation. *Hydrological processes*, 22(21), 4301-4309.

-----  
*Finally, the section presenting results is quite confused and difficult to read. Maybe some Tables and example of predicted signals, at each lead time, should be better to compare the models than the proposed indirect representations. Usually, indirect representations (Fig 6, Fig 7) hide the defect of flood prediction when the peak is not good but the rest of the hydrograph quite well represented. For this reason, it is essential in case of flood prediction to provide an accurate measurement of the quality of the predicted peak, or a representation of the signals.*

**Reply:** We respect the criticism and have tried our best to make all the necessary modification for improving the readability of our manuscript.

We notice that the 6 hours' time-step dataset is used to predict the TGR inflow, thus the horizons t+4, t+8, t+12 are represented for different lead times 1st day, 2nd day and 3rd day. In fact, the residual values (Observation - Forecast) of the three models at horizons t+4, t+8 and t+12 in Fig. 7 not only show the forecasting accuracy of flood peak, but also display the forecasting accuracy of the hydrograph. In Fig.6: the criterion MAE is suitable for measuring the accuracy at medium and low flows, while the criterion RMSE would provide a good measure of the good of fit at high discharge. As suggested, we added the criterion  $G_{bench}$ , which could estimate the performance of forecasting model by using the observed data shifted backwards by one or more time-lags. The criterion CC could estimate the goodness-of-fit between observed and simulated (forecasted) flood hydrograph. Moreover, we propose a coherent set of evaluation criteria to fully distill the robustness (reliability, vulnerability and resilience) of model based on the criterion RAE.

-----  
*In conclusion, this lack of rigor must be corrected. The question about the kind of model (recurrent or not) must find a response. Only after this response it will be possible to evaluate the quality of the evaluation of the results. Flood forecasting is very difficult and I encourage the authors to deal with more accurately.*

**Reply:** Yes, we agree the recurrent mechanism is one of the most crucial part and have tried our best to make all the necessary modification and clear response to the question about the kind of model (recurrent or not). We also like to notice that we are confident the originality of our proposed methodology in optimizing the parameters of recurrent ANFIS (R-ANFIS) model to overcome the instability and local minima problems as well as improve model's generalization and robustness, which could be very useful and valuable for promoting multi-step-ahead flood forecast as well as for better water

management.

---

Specific comments

- *Title: could you justify why the model is qualified of "robust" in the title?*

**Reply:** Thank you for providing this insightful point. We notice that the number of robust knowledge, indicators and assessments studies have been dramatically increased in last few years. In our paper, a coherent set of evaluation criteria is used to fully explore the model's accuracy (MAE, RMSE, CC &  $G_{\text{bench}}$ ) and robustness (reliability, vulnerability & resilience). Taking the horizon  $t+12$  (three days ahead) for example, the comparison analysis between R-ANFIS and MR-ANFIS shows that the MR-ANFIS model can further enhance the  $G_{\text{bench}}$ , CC, reliability and resilience by 5.80%, 2.04%, 5.05%, and 3.61%, respectively, as well as decrease the MAE, RMSE, vulnerability by 9.91%, 13.79%, and 9.22%, respectively. Such results evidently promote data-driven model's generalization (accuracy & robustness) and leads to better decisions on real-time reservoir operation during flood season. That is why we used the word "robust" including high accuracy and robustness in the title.

---

- *Abstract*

*It is not evident, reading only the abstract to know what are the criteria CC and CE, it is thus necessary to provide, at least, the name of the criteria in the abstract: for example, Ce is the Nash-Sutcliff criterion or the coefficient of determination. And CC is the linear coefficient of correlation.*

**Reply:** Thanks for your friendly suggestion. We have provided the name of the criteria in the abstract as follow.

A coherent set of evaluation criteria is used to fully explore the model's accuracy, i.e., Mean Absolute Error (MAE), Root Mean Square Error (RMSE), Coefficient of persistence ( $G_{\text{bench}}$ ) and Coefficient of Correlation (CC) and robustness (reliability, vulnerability & resilience).

---

- *Section 3.3. Evaluation criteria.*

*The aim of the paper is to provide prediction. Usually, in this case it is necessary to use a criteria specific to prediction, for example du persistency criteria (Kitanidis, P. K. and Bras, R. L.: Real-time forecasting with a conceptual hydrologic model: 2. Applications and results, Water Resour. Res., 16(6), 1034–1044, doi:10.1029/WR016i006p01034, 1980.). We suggest to authors to calculate also this criteria. This criteria is mandatory when previous measured discharges are used to*



calculate future discharges, but it is no clear in the paper if previous observed discharges are used or only previous simulated discharges: having exact equations should remove the question.

**Reply:** Thanks for your constructive comment. We agree and have replaced the criterion CE with Coefficient of persistence ( $G_{\text{bench}}$ ) and updated the results of Fig. 6, Fig.10 and Table 3. The criterion  $G_{\text{bench}}$  is described as,

$$G_{\text{bench}} = 1 - \frac{\sum_{i=1}^N (Q_f(i) - Q_o(i))^2}{\sum_{i=1}^N (Q_o(i) - Q_{\text{bench}}(i))^2}, \quad G_{\text{bench}} \leq 1 \quad (6)$$

where  $Q_{\text{bench}}(i)$  is the observed data shifted backwards by one or more time-lags. In this case, we use the observed data at time step  $t$  as a prediction of the TGR inflow at  $t+n$ , and  $n$  is the horizon.

-----  
*In table 2 it is not so clearly indicated if the  $Q(t)$  of TGR refers to observed or simulated discharge ( $Q_f$  or  $Q_o$ )? If it is  $Q_o$ , then the model is not recurrent at al. The model can simulate a dynamic basin but it is static (finite impulse response).*

**Reply:** Thanks. Sorry for such mistake. We have changed the variable  $Q(t)$  into  $Q_o(t)$  in the text and Table 2.

-----  
*To verify if the model has a utility it is also possible to calculate the Nash criterion of the signal  $Q_o(t+\text{lag})$ . If the Nash criterion of the prediction  $Q_f(t+\text{lag})$  has a better Nash criterion than the previous one (on  $Q_o$ ), then the predictor is useful; in the contrary case, the model has no interest at all, it is only a model that duplicate, at its output, the received input. This behavior is easy to detect when predicted signals are provided, but it is not the case in this paper. This is a shame.*

**Reply:** The constructive comment is sincerely appreciated. We have replaced the criterion CE with Coefficient of persistence ( $G_{\text{bench}}$ ) and updated the results of Fig. 6, Fig.10 and Table 3.

-----  
*Technical corrections*

*P5, L15: correct in Fig 3.*

**Reply:** We thank you for taking time to read our manuscript and give valuable comments for it. Sorry for such mistake. We have changed Fig.2 into Fig.3.

-----  
*Notations in eq 3 are nor fully coherent:  $i$ , which is the number of a considered example, appears sometimes in index, sometime in parenthesis.*

**Reply:** Thanks for your friendly suggestion. Sorry for such mistakes. We have unified

the notations of all equations in the paper.

---

*P6, L1-2 parameters are not linear or nonlinear. They are used in a linear combination or in a nonlinear function.*

**Reply:** Thanks for your friendly suggestion. We have deleted the descriptions (linear or nonlinear parameters) in the paper.

---

*P6, L8: it is necessary to add the equation of the 3 models to express clearly the inputs and outputs variables of the models. Unhopefully, there is a great confusion in the literature about the concept of recurrent (infinite impulse response) and static (Finite impulse response). Could you add the equations?*

**Reply:** The constructive comment is sincerely appreciated. We have revised Figure 3 to explain how the recurrent learning mechanism will be used to simulate and predict when external feedback (observed value) is missing, by using inter feedback (simulated value) in Model 2&3. Please find the revised Figure 3.

---

*Eq 9 the criteria RAE is not so good because it could be very high in case of low discharge. It is thus not good when there is very low and very high discharges? In the case of the 3 rivers it is not possible to have our own idea as signals are not provided.*

**Reply:** We agree your constructive comment. As suggested, Eq 9 has been modified. In our paper, the Mean Absolute Error (MAE), Root Mean Square Error (RMSE), Coefficient of persistence ( $G_{\text{bench}}$ ) and Coefficient of Correlation (CC) are selected to evaluate the forecasting accuracy of the three models. We also propose a coherent set of evaluation criteria to fully distill the robustness (reliability, vulnerability and resilience) of model. As known, the criterion MAE is suitable for measuring the accuracy at medium and low flows. The criterion RMSE provides a good measure of the good of fit at high discharge. The criterion  $G_{\text{bench}}$  could estimate the performance of forecasting model by using the observed data shifted backwards by one or more time-lags. The criterion CC could estimate the goodness-of-fit between observed and simulated (forecasted) flood hydrograph. Moreover, we propose a coherent set of evaluation criteria to fully distill the robustness (reliability, vulnerability and resilience) of model.

---

*In P9 and others, please used accurate notation: not  $Q$  but  $Q_f$  or  $Q_o$ . To be consistent with your own notations.*

**Reply:** Thanks. Sorry for such mistake. We have changed the variable  $Q(t)$  into  $Q_o(t)$

in the text and Table 2.

---

The authors would like to thank the editor and anonymous reviewers for their review and valuable comments related to this manuscript.
